# Supplementary material for: The worsening of skeletal muscle atrophy induced by immobilization at the early stage of remobilization correlates with BNIP3-dependent mitophagy
Source: PubMed Central journal article supplement (PMC10401904; doi:10.1186/s12891-023-06759-2), 2023-08-04

**Figure 4. C Total HIF-1 $\alpha$**

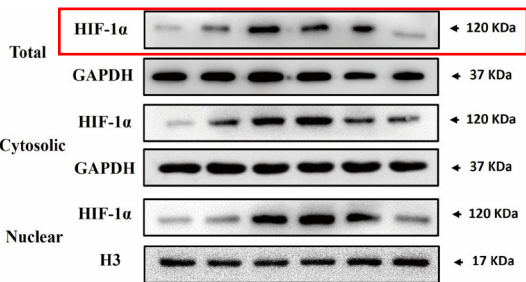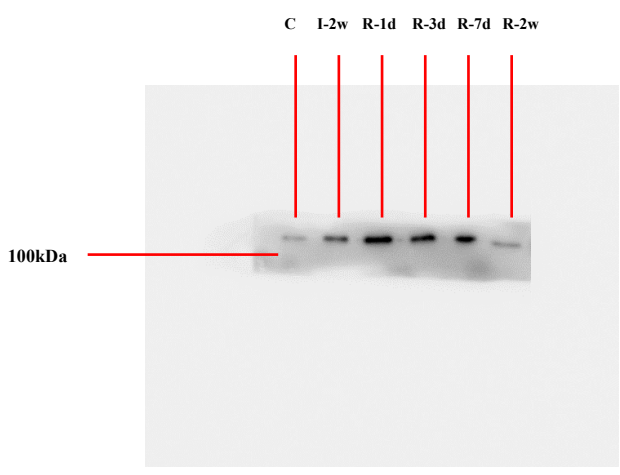

**Total HIF-1 $\alpha$  (Repeated)**

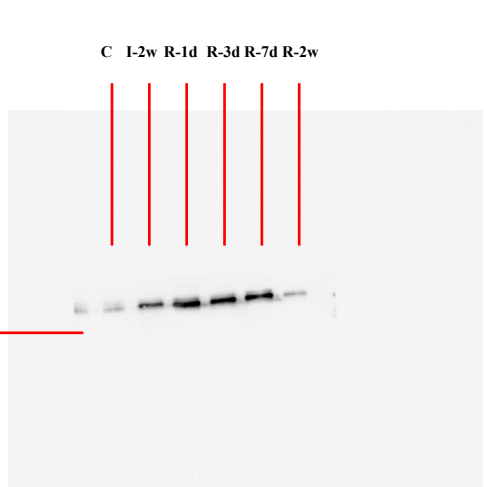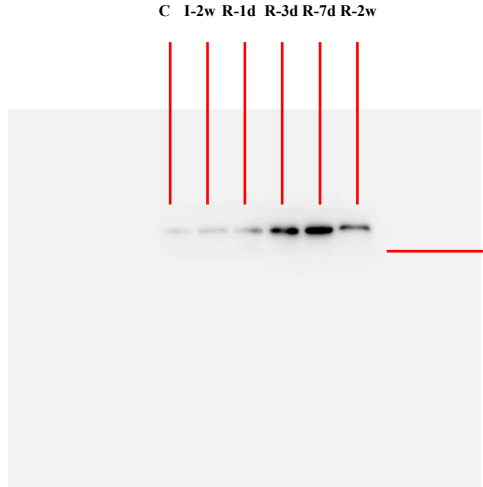

**Figure 4. C Total GAPDH**

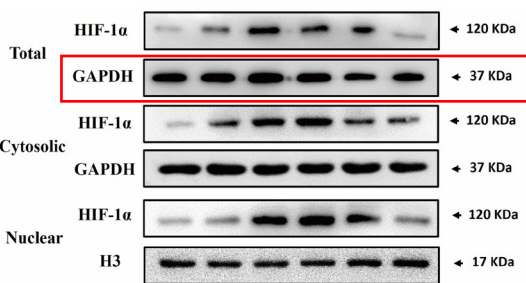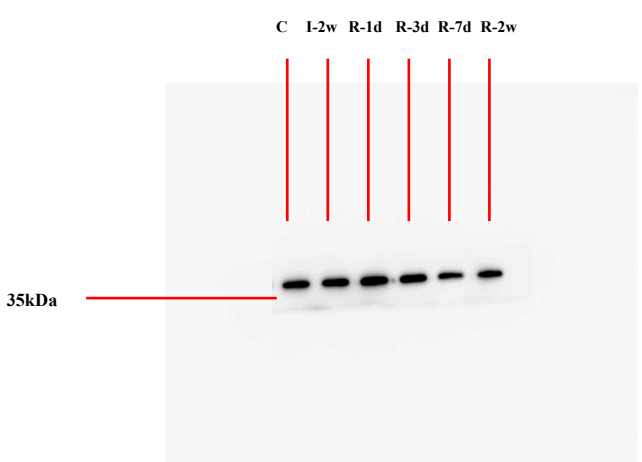

**Total GAPDH (Repeated)**

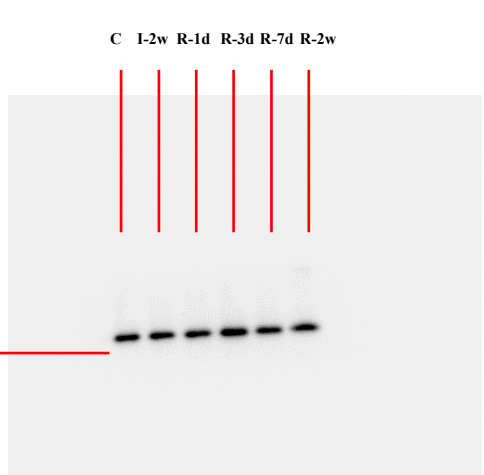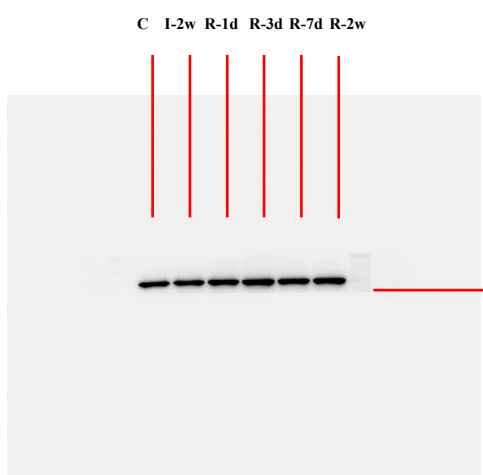

**Figure 4. C Cytosolic HIF-1 $\alpha$**

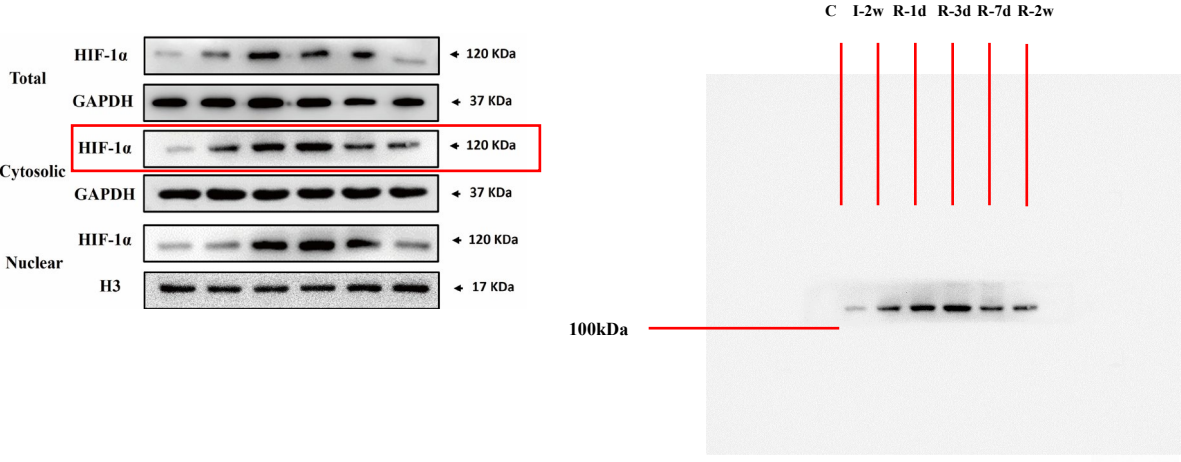

**Cytosolic HIF-1 $\alpha$  (Repeated)**

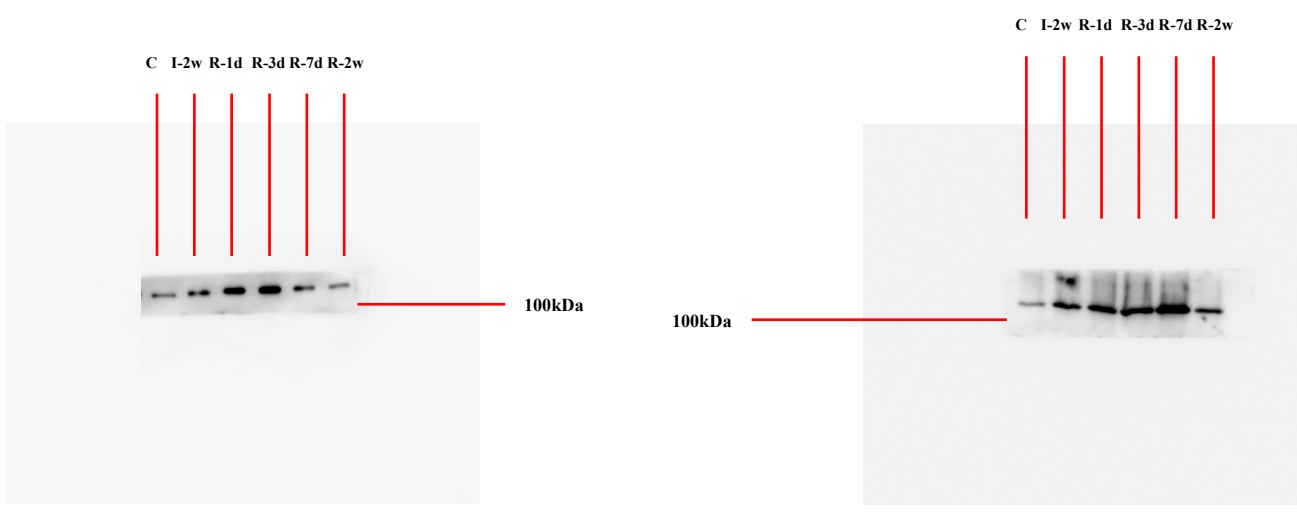

**Figure 4. C Cytosolic GAPDH**

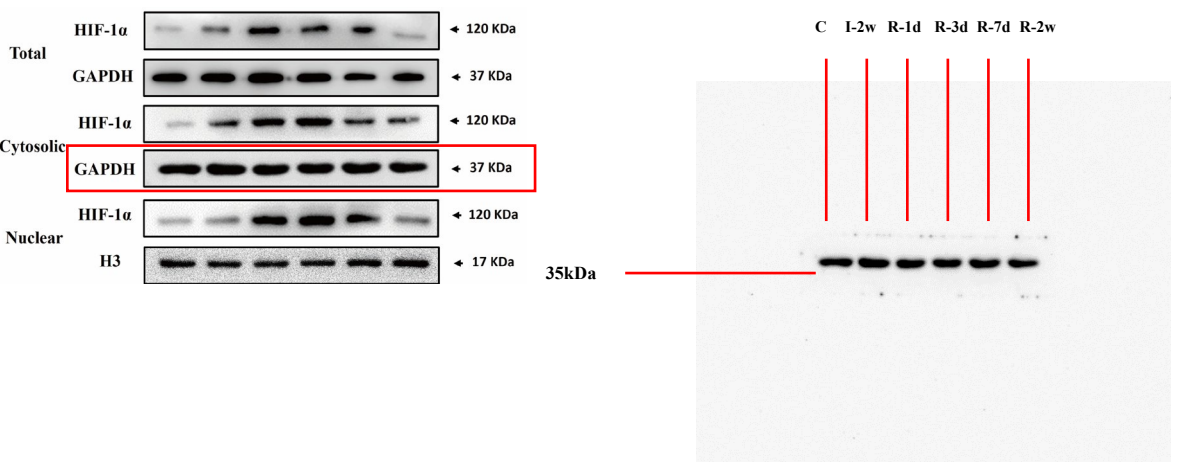

**Cytosolic GAPDH (Repeated)**

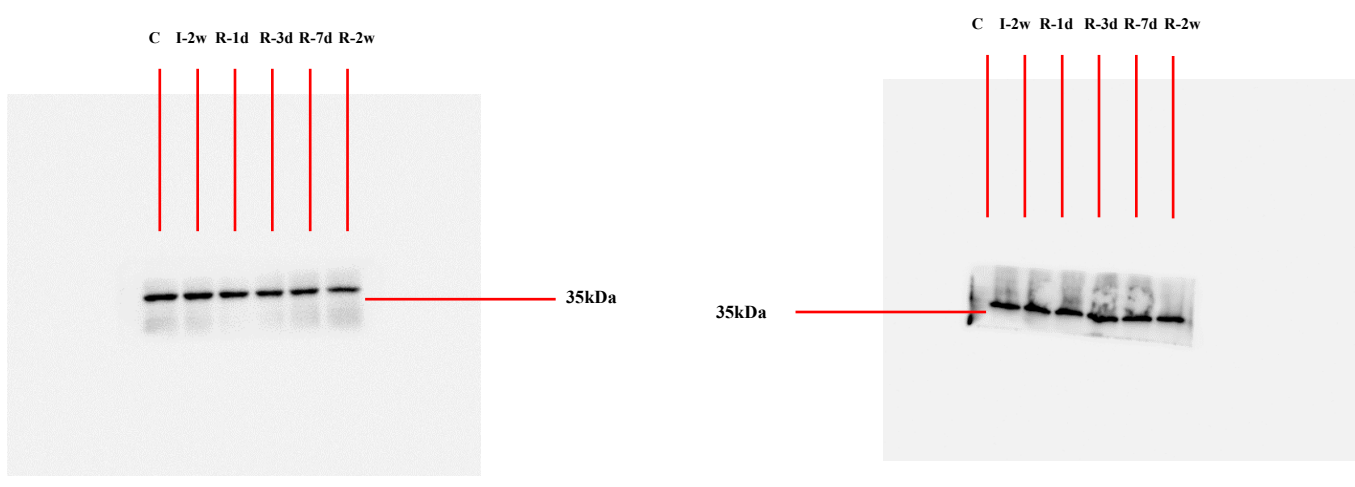

**Figure 4. C Nuclear HIF-1 $\alpha$**

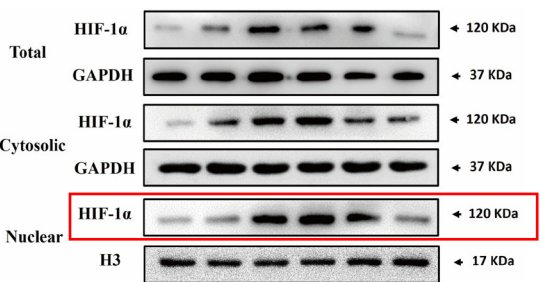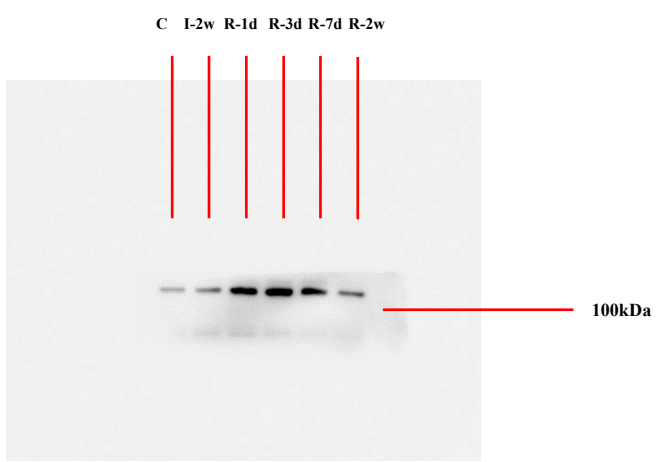

**Nuclear HIF-1 $\alpha$  (Repeated)**

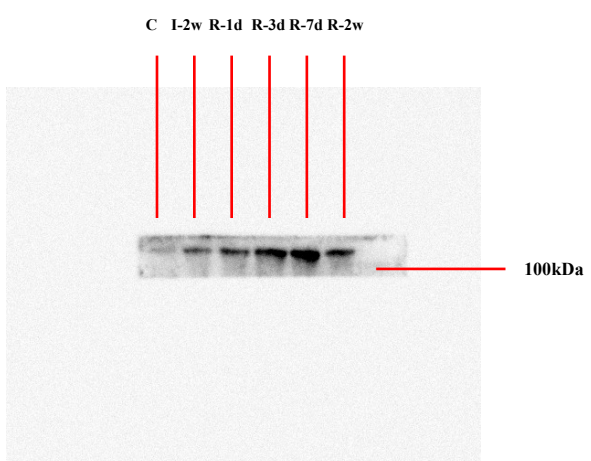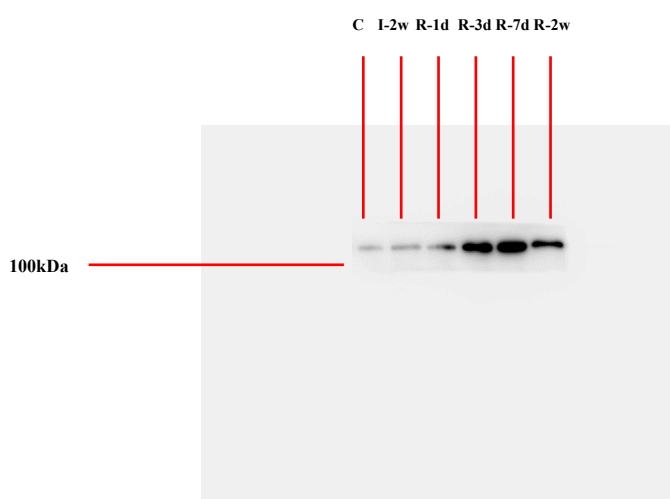

**Figure 4. C Nuclear H3**

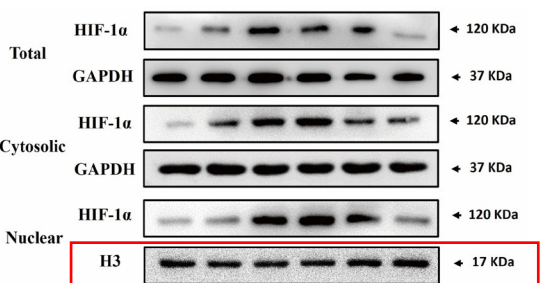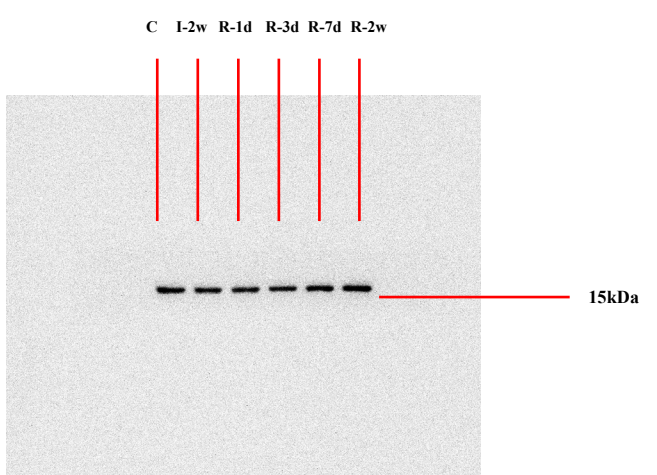

**Nuclear H3 (Repeated)**

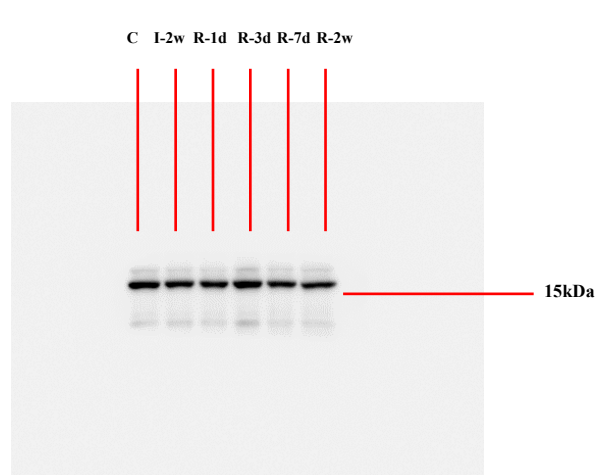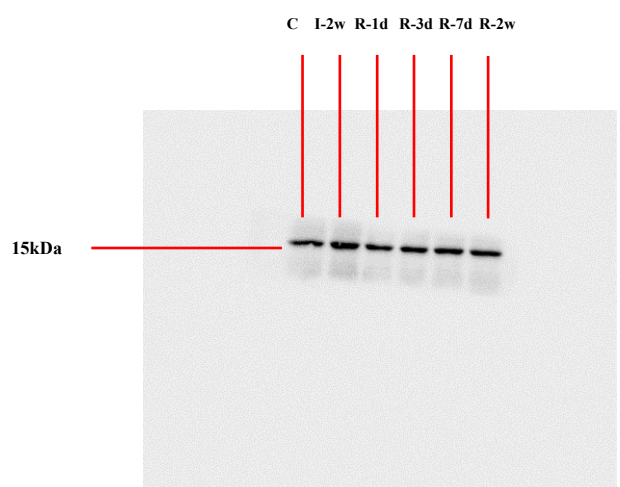

**Figure 5. B PGC-1 $\alpha$**

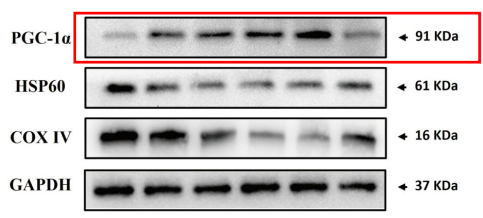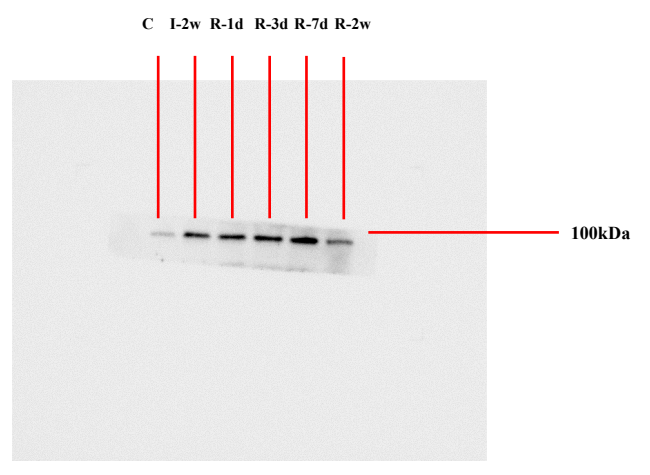

**PGC-1 $\alpha$  (Repeated)**

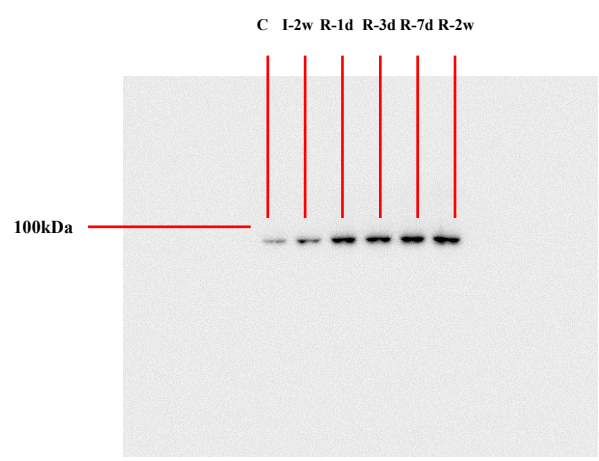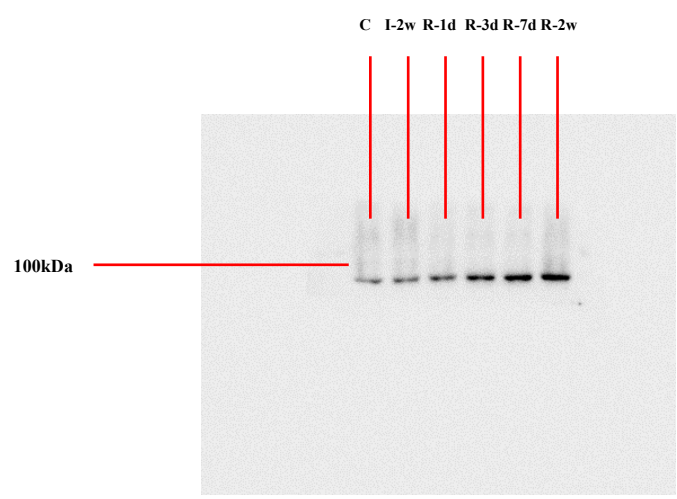

**Figure 5. B HSP60**

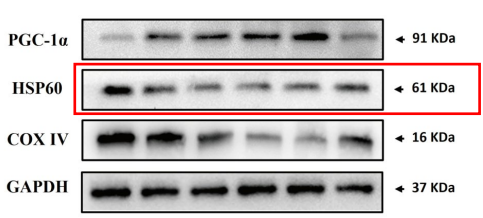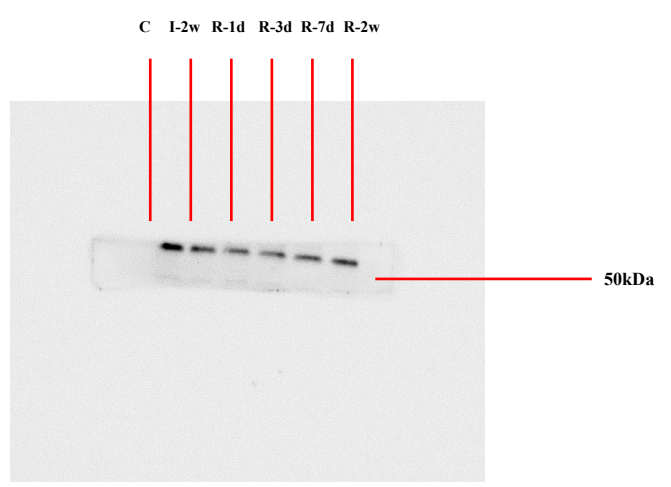

**HSP60 (Repeated)**

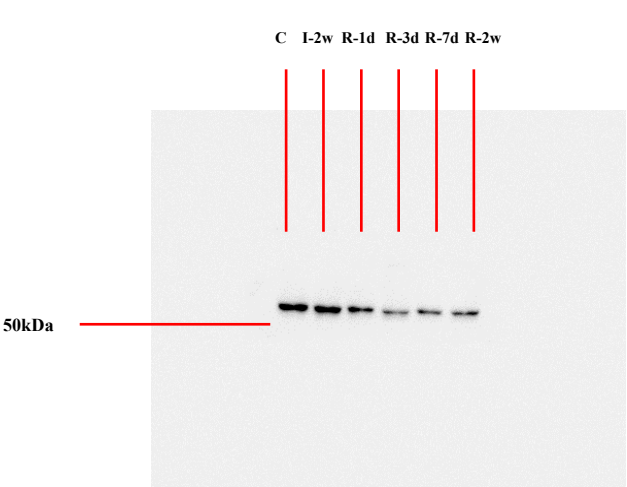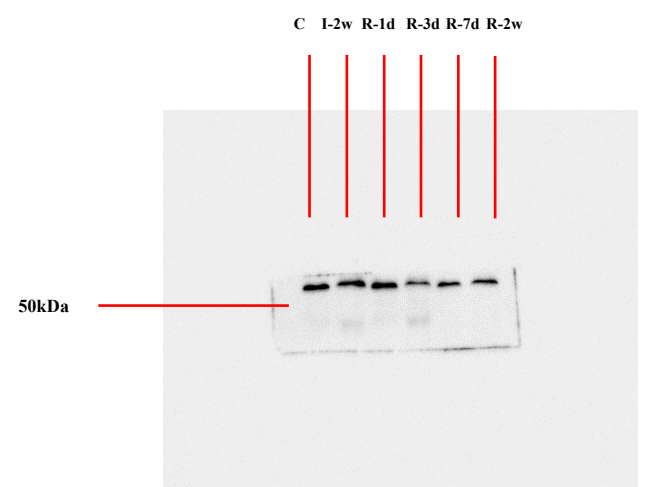



**Figure 5. B COX IV**

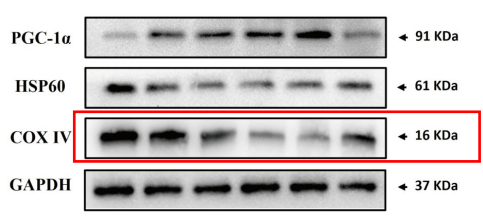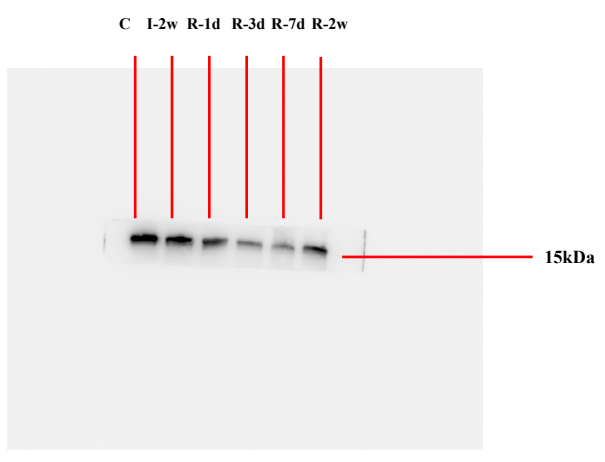

**COX IV (Repeated)**

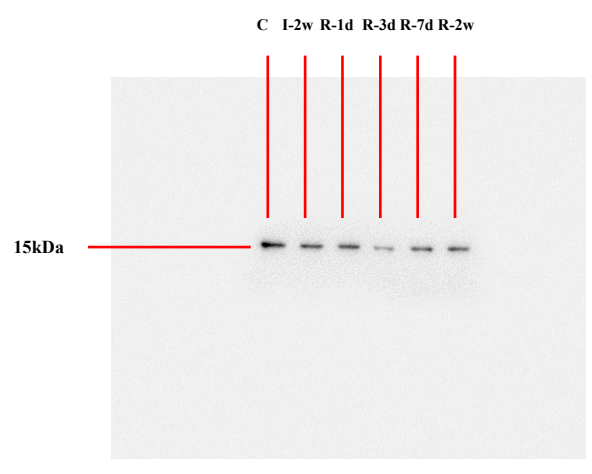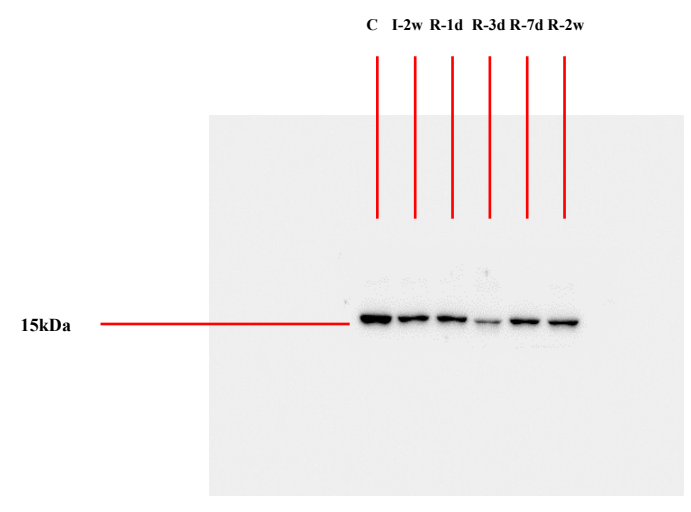

**Figure 5. B GAPDH**

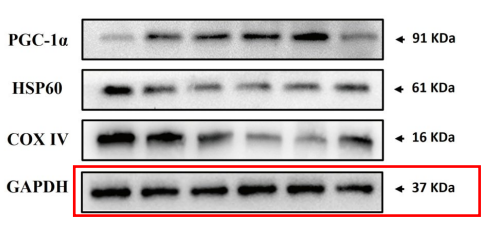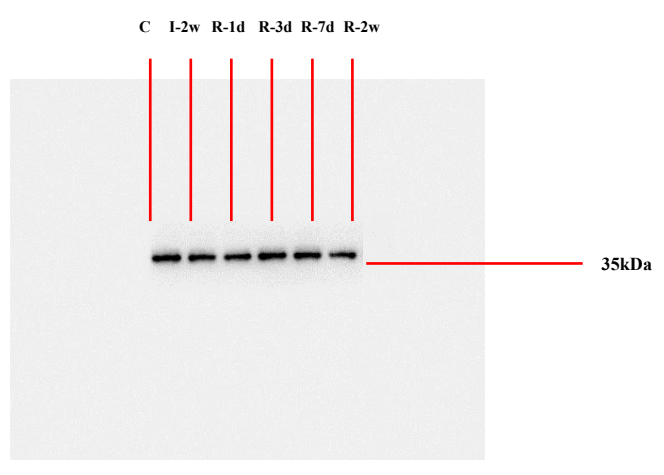

**GAPDH (Repeated)**

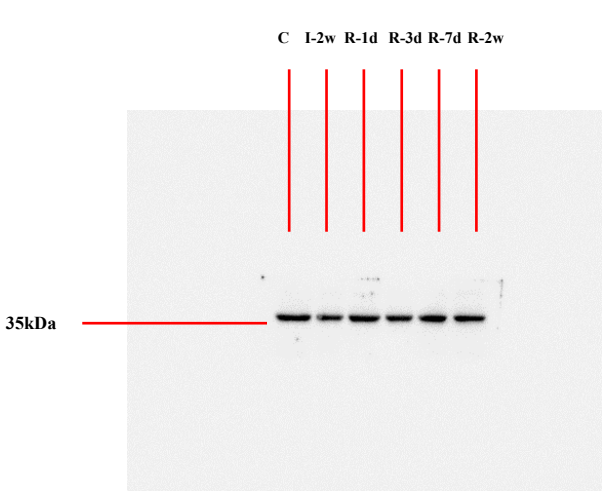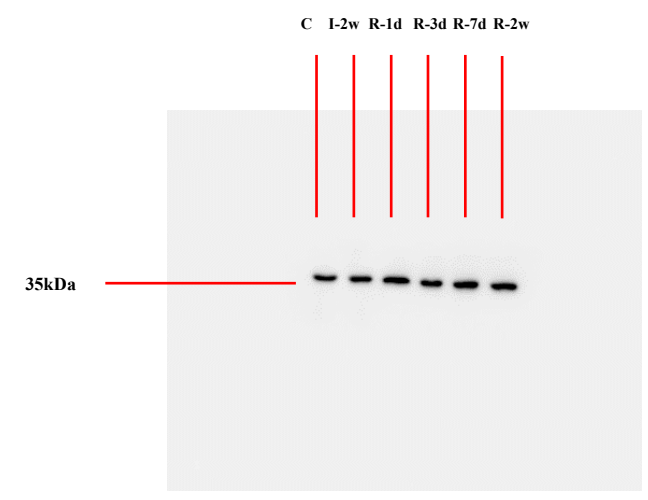

**Figure 5. C PINK1**

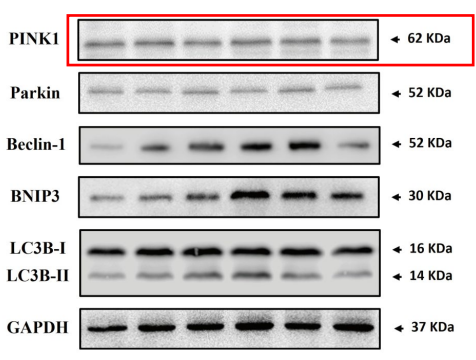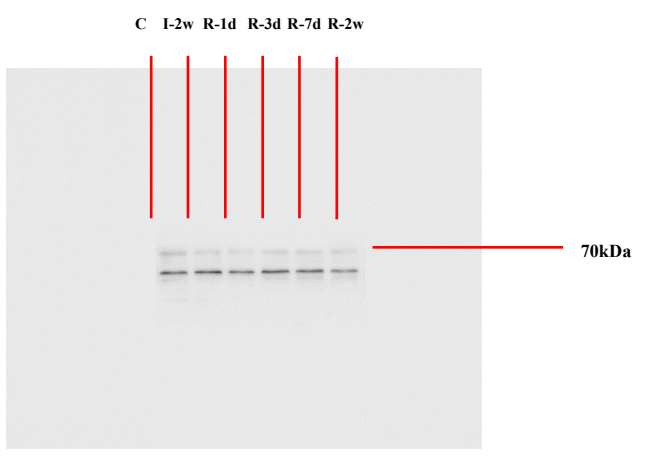

**PINK1 (Repeated)**

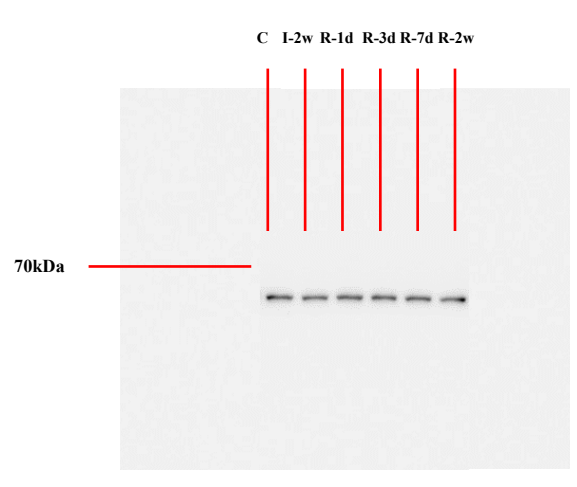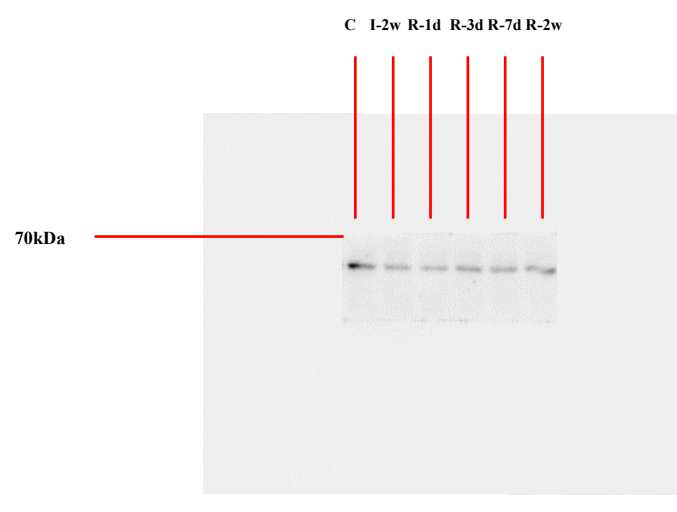

**Figure 5. C Parkin**

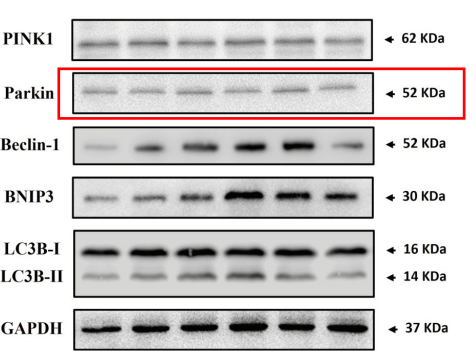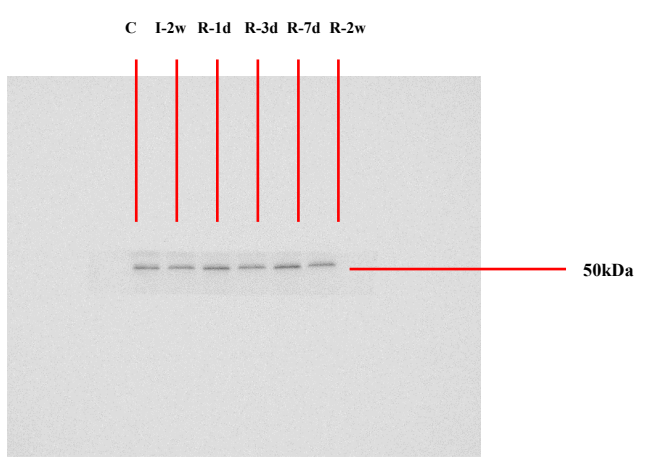

**Parkin (Repeated)**

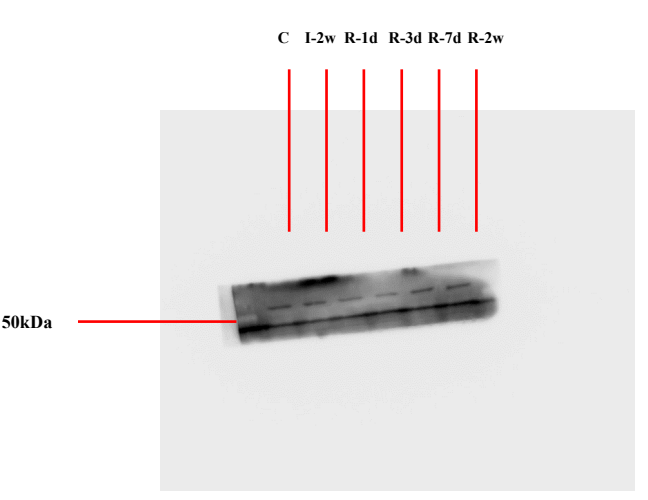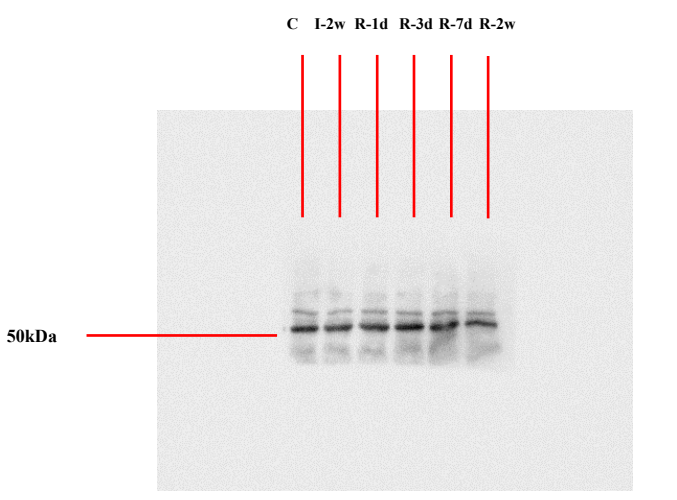

**Figure 5. C Beclin-1**

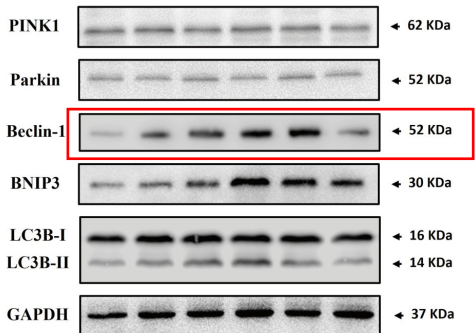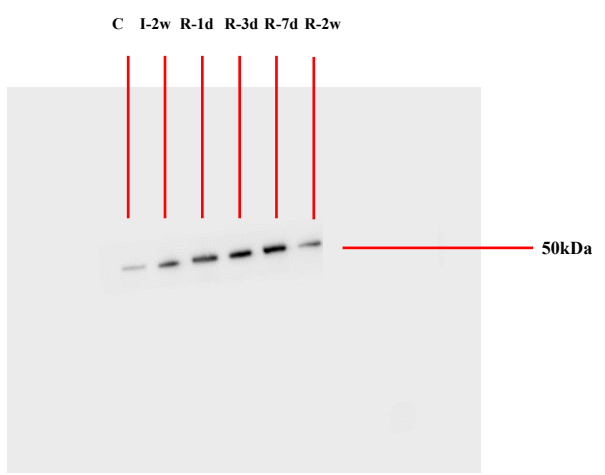

**Beclin-1 (Repeated)**

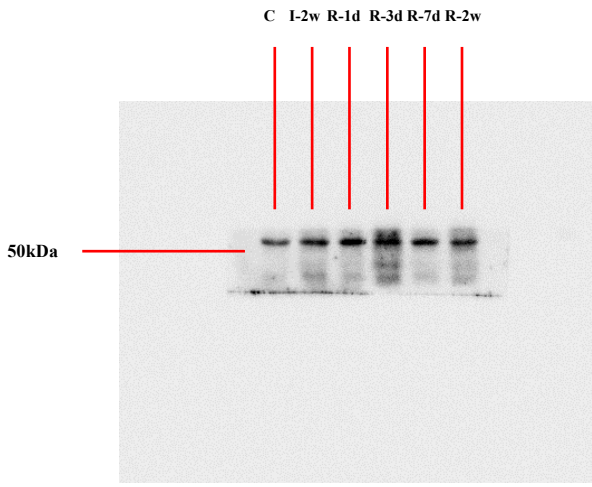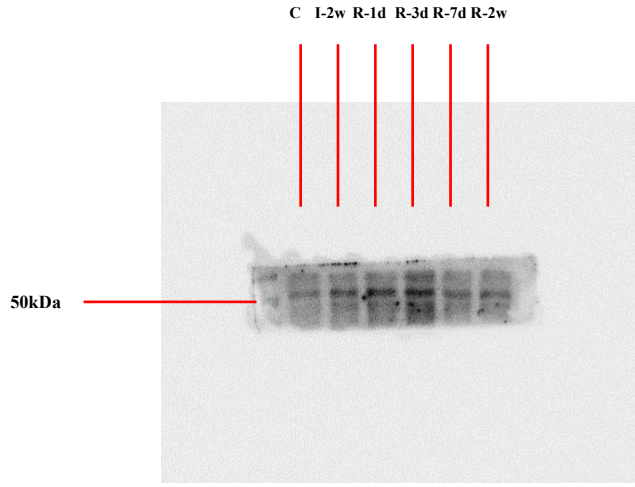

**Figure 5. C BNIP3**

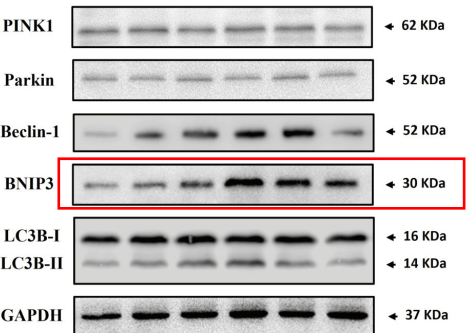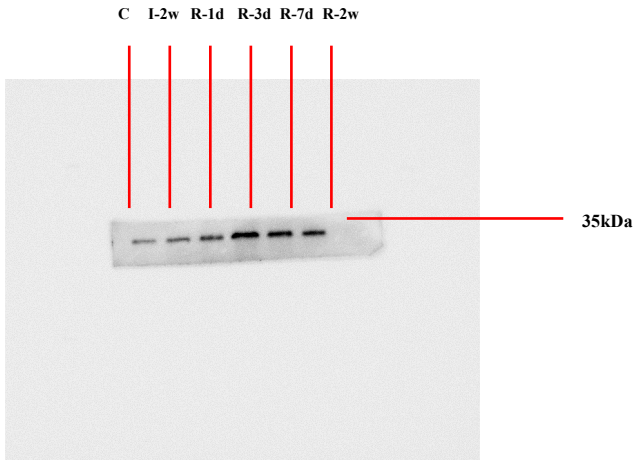

**BNIP3 (Repeated)**

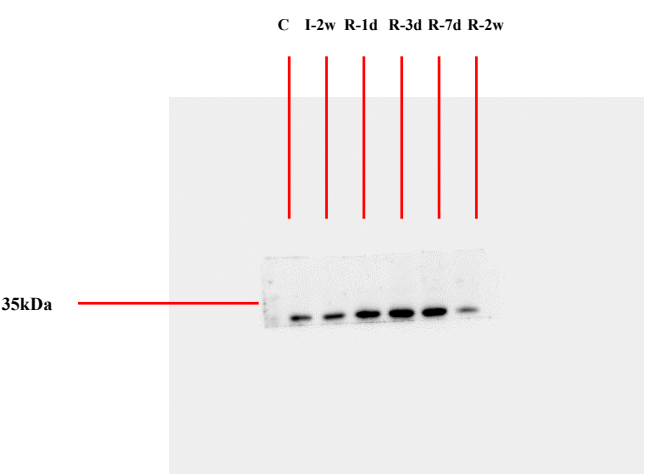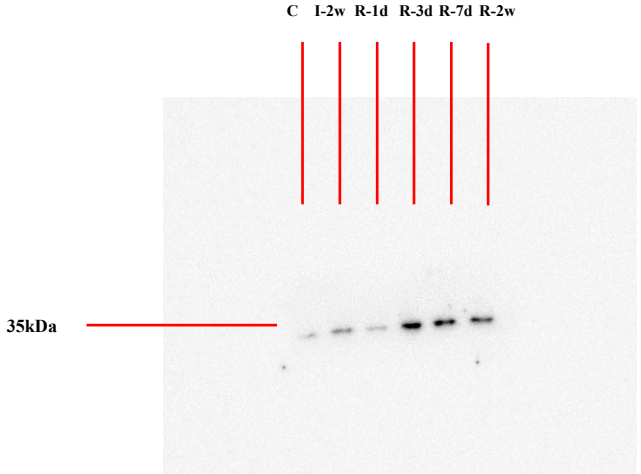

**Figure 5. C LC3B**

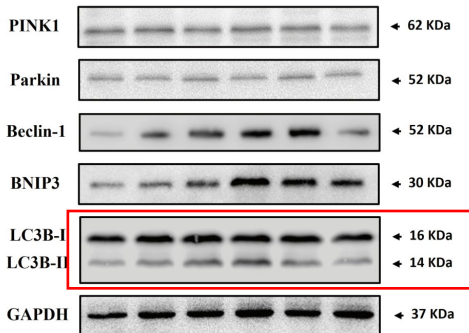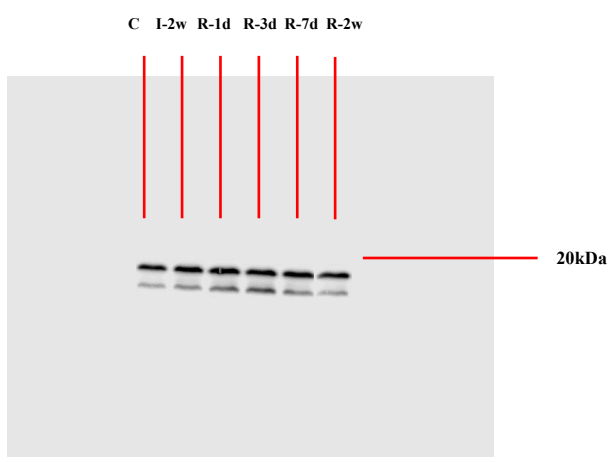

**LC3B (Repeated)**

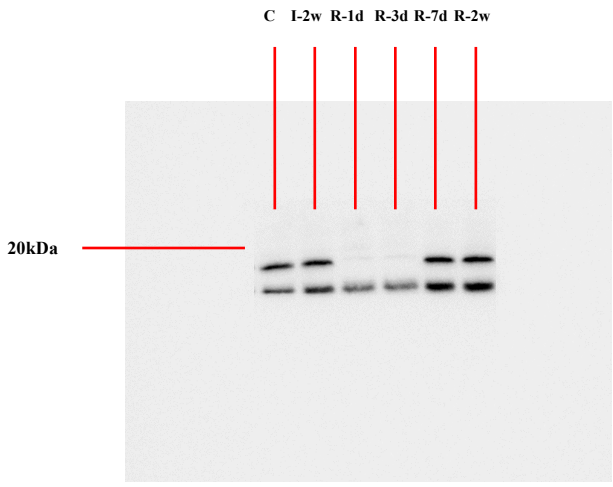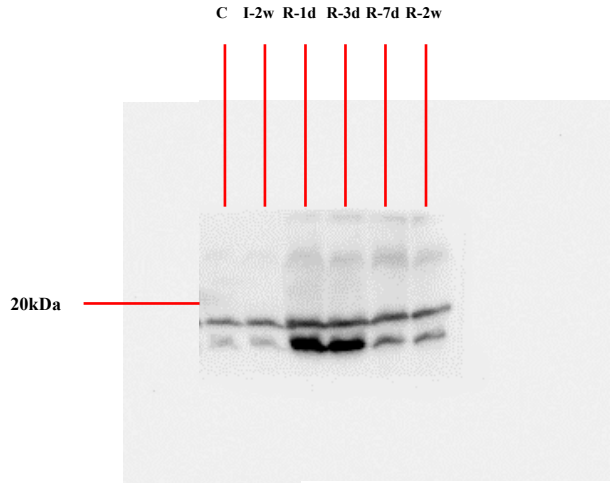

**Figure 5. C GAPDH**

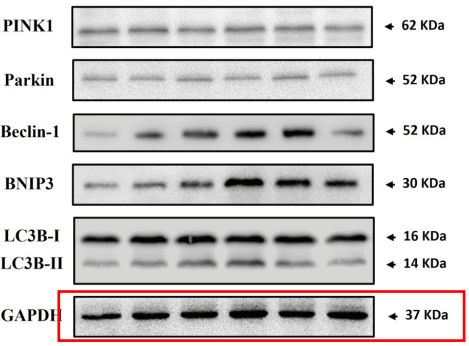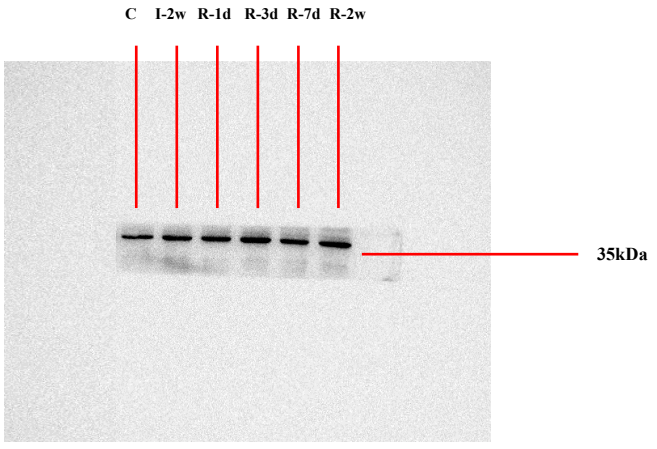

**GAPDH (Repeated)**

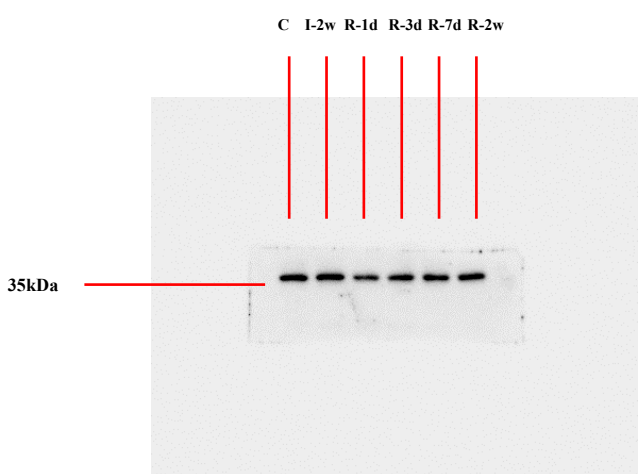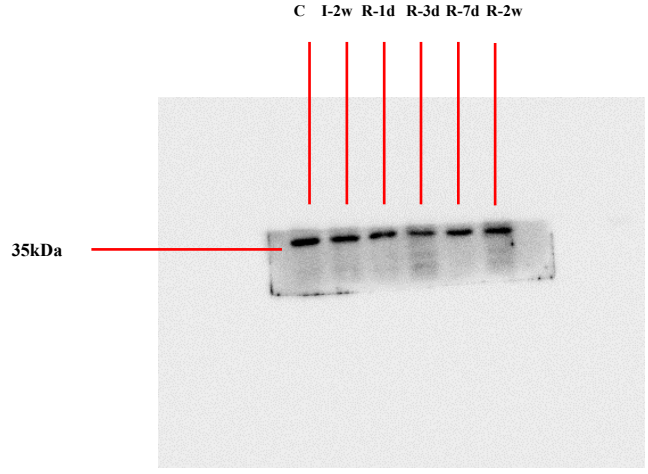

Supplement: 12891_2023_6759_MOESM1_ESM.pdf [file 12891_2023_6759_MOESM1_ESM.pdf]
